# Supplementary material
Source: PubMed Central journal article supplement (PMC117552)
Supplement: pnas_022626699_1.pdf [file pnas_022626699_1.pdf]

**Table 1. Plant species sampled and results of MLE transposase PCR assay**

| Group/Order          | Family/subfamily/tribe            | Species                           | Ab                           | PCR results |   | Tissue/DNA source |   |
|----------------------|-----------------------------------|-----------------------------------|------------------------------|-------------|---|-------------------|---|
|                      |                                   |                                   |                              | L           | H |                   |   |
| <b>MONOCOTS</b>      |                                   |                                   |                              |             |   |                   |   |
| Poales               | Poaceae/Pharoideae                | <i>Pharus lappulaceus</i>         | Ph                           | +           | + | 1                 |   |
|                      | Poaceae/Bambusoideae/Parianeae    | <i>Pariana radiceflora</i>        | Pr                           | +           | + | 1                 |   |
|                      | Poaceae/Bambusoideae/Bambuseae    | <i>Arundinaria simonii</i>        | As                           | +           | - | 2                 |   |
|                      |                                   | <i>Otatea acuminata</i>           | Oa                           | +           | - | 1                 |   |
|                      |                                   | <i>Phyllostachys juncea</i>       | Pj                           | +           | - | 1                 |   |
|                      | Poaceae/Bambusoideae/Olyreae      | <i>Litachne humilis</i>           | Lh                           | +           | + | 1                 |   |
|                      | Poaceae/Ehrhartoideae/Ehrharteae  | <i>Ehrartha dura</i>              | Ed                           | -           | + | 1                 |   |
|                      | Poaceae/Ehrhartoideae/Oryzeae     | <i>Oryza sativa</i>               | Os                           | +           | + | 3                 |   |
|                      |                                   | <i>Oryza nivara</i>               | On                           | +           | + | 3                 |   |
|                      |                                   | <i>Oryza grandiglumis</i>         | Og                           | +           | + | 3                 |   |
|                      |                                   | <i>Zizania aquatica</i>           | Za                           | +           | + | 1                 |   |
|                      |                                   | Poaceae/Pooideae/Triticeae        | <i>Triticum aestivum</i>     | Ta          | + | +                 | 4 |
|                      | <i>Hordeum vulgare</i>            |                                   | Hv                           | +           | + | 4                 |   |
|                      | Poaceae/Pooideae/Aveneae          |                                   | <i>Avena sativa</i>          | As          | + | +                 | 1 |
|                      | Poaceae/Chloroideae/Cynodonteae   | <i>Cynodon dactylon</i>           | Cd                           | +           | + | 5                 |   |
|                      | Poaceae/Centothecoideae           | <i>Orthoclada laxa</i>            | Ol                           | +           | + | 1                 |   |
|                      | Poaceae/Panicoideae/Paniceae      | <i>Setaria italica</i>            | Si                           | +           | + | 1                 |   |
|                      |                                   | <i>Pennisetum squamosum</i>       | Ps                           | +           | + | 4                 |   |
|                      |                                   | <i>Pennisetum glaucum</i>         | Pg                           | +           | + | 4                 |   |
|                      |                                   | Poaceae/Panicoideae/Andropogoneae | <i>Coix sp.</i>              | Cx          | + | +                 | 6 |
|                      |                                   |                                   | <i>Sorghum bicolor</i>       | Sb          | + | +                 | 6 |
|                      |                                   |                                   | <i>Tripsacum dactyloides</i> | Td          | + | +                 | 6 |
|                      |                                   |                                   | <i>Tripsacum pilosum</i>     | Tp          | + | +                 | 6 |
|                      |                                   |                                   | <i>Zea diploperennis</i>     | Zd          | + | +                 | 7 |
|                      |                                   |                                   | <i>Zea mays huehue</i>       | Zh          | + | +                 | 7 |
|                      |                                   |                                   | <i>Zea mays parviglumis</i>  | Zp          | + | +                 | 7 |
|                      | <i>Zea mays lanceolata</i>        |                                   | Zl                           | +           | + | 7                 |   |
|                      | <i>Zea mays mexicana</i>          | Zx                                | +                            | +           | 7 |                   |   |
|                      | <i>Zea mays mays</i>              | Zm                                | +                            | +           | 2 |                   |   |
|                      | Asparagales                       | Iridaceae                         | <i>Neomarica longifolia</i>  | Nl          | + | -                 | 8 |
|                      |                                   |                                   | <i>Iris brevicaulis</i>      | lb          | + | -                 | 8 |
|                      |                                   |                                   | <i>Iris fulva</i>            | lf          | + | -                 | 8 |
| <i>Iris hexagona</i> |                                   |                                   | lh                           | +           | - | 8                 |   |
| <i>Iris nelsonii</i> |                                   |                                   | ln                           | +           | - | 8                 |   |
| <i>Iris verna</i>    |                                   |                                   | lv                           | +           | - | 8                 |   |
| Asparagaceae         |                                   | <i>Asparagus densiflorus</i>      | Ad                           | -           | - | 2                 |   |
| Commelinidae         | Bromeliaceae                      | <i>Alchemea weilbachii</i>        | Aw                           | -           | - | 2                 |   |
| <b>EUDICOTS</b>      |                                   |                                   |                              |             |   |                   |   |
| Caryophyllales       | Caryophyllaceae                   | <i>Dianthus sp.</i>               | Ds                           | +           | - | 2                 |   |
| Saxifragales         | Saxifragaceae                     | <i>Saxifraga sarmentosa</i>       | Ss                           | +           | - | 2                 |   |
| Ranunculales         | Ranunculaceae                     | <i>Aquilegia sp.</i>              | Aq                           | +           | - | 2                 |   |
| Rosidae              | Fabaceae/Papilionoideae/Phaseolae | <i>Glycine max</i>                | Gm                           | +           | - | 9                 |   |

|              |                                   |                                |    |   |   |    |
|--------------|-----------------------------------|--------------------------------|----|---|---|----|
|              | Fabaceae/Papilionoideae/Trifoliae | <i>Medicago sativa</i>         | Ms | + | - | 9  |
|              |                                   | <i>Trifolium pratense</i>      | Tr | + | - | 9  |
|              | Brassicaceae                      | <i>Arabidopsis thaliana</i>    | At | + | - | 10 |
|              | Malvaceae                         | <i>Gossypium hirsutum</i>      | Gh | - | - | 5  |
| Asteridae    | Solanaceae                        | <i>Nicotiana tabacum</i>       | Nt | + | - | 11 |
|              | Sarraceniaceae                    | <i>Sarracenia olata</i>        | So | - | - | 12 |
|              | Menyanthaceae                     | <i>Nymphoides chardarta</i>    | Nc | - | - | 2  |
| LOWER DICOTS |                                   |                                |    |   |   |    |
| Laurales     | Lauraceae                         | <i>Persea americana</i>        | Pa |   |   | 2  |
| Magnoliales  | Magnoliaceae                      | <i>Liriodendron tulipifera</i> | Lt | - | - | 9  |
| Piperales    | Piperaceae                        | <i>Peperomia mahuiifolia</i>   | Pm | - | - | 2  |
|              | Aristolochiaceae                  | <i>Hexastylus sp.</i>          | Hx | - | - | 8  |
| Nymphaeales  | Nymphaeaceae                      | <i>Nymphaea sp.</i>            | Ny | - | - | 2  |
| GYMNOSPERMS  |                                   |                                |    |   |   |    |
| Gnetales     | Gnetaceae                         | <i>Gnetum guemon</i>           | Gg | - | - | 2  |
| Ginkgoales   | Ginkgoaceae                       | <i>Ginkgo biloba</i>           | Gb | - | - | 2  |
| Cycadales    | Cycadaceae                        | <i>Zamia furfuracea</i>        | Zf | - | - | 2  |
| Conifers     | Pinaceae                          | <i>Pinus elliotii</i>          | Pi | - | - | 12 |
| FERNS        |                                   |                                |    |   |   |    |
| Filicales    | Dryopteridaceae                   | <i>Polystichum munitum</i>     | Po | - | - | 8  |

PCR results refer to the products amplified by our MLE transposase assay (see Fig. 2b). "Low" stands for the product of lower molecular weight (~380 bp) whereas "High" refers to the products of slightly higher molecular weight (~470 bp). Ab: species abbreviation. Tissue/DNA sources: 1, E. Kellogg (Univ. Missouri) 2, Univ. Georgia greenhouses; 3, S. McCouch (Cornell Univ.); 4, N. Jiang (Univ. Georgia); 5, A. Patterson (Univ. Georgia); 6, L. Arthur (Univ. Georgia); 7, J. Doebley (Univ. Wisconsin) 8, E. Kentner (Univ. Georgia); 9, W. Parrott (Univ. Georgia); 10, R. Meagher (Univ. Georgia); 11, R. Malmberg (Univ. Georgia); 12, S. Covert (Univ. Georgia).
