# Supplementary material
Source: PubMed Central journal article supplement (PMC117552)
Supplement: pnas_022626699_2.pdf [file pnas_022626699_2.pdf]

**Table 2. Complete and partial plant MLEs identified in GenBank (September 2001 release) and animal MLEs included in phylogenetic analyses**

| MLE clade/species             | Name                        | Acc           | Chr      | Position       | Size, bp     | TIRs, bp |    |
|-------------------------------|-----------------------------|---------------|----------|----------------|--------------|----------|----|
| <b>DD39D plant MLEs</b>       |                             |               |          |                |              |          |    |
| <i>Glycine max</i>            | <i>Soymar1</i>              | AF078934      | ND       | 1-3491         | 3,491        | 40       |    |
| <i>Oryza sativa</i>           | <i>Osmar1</i>               | AF172282      | 11       | 227526-232784  | 5,259        | 26       |    |
|                               | <i>Osmar2</i>               | AP000836      | 1        | 36040-41604    | 5,565        | 31       |    |
|                               | <i>Osmar2b</i>              | AP003294      | 1        | 104503-109697  | 5,195        | 31       |    |
|                               | <i>Osmar3</i>               | AL442115      | 4        | 76624-78029*   | ND           | ND       |    |
|                               | <i>Osmar4</i>               | AP003574      | 6        | 44316-49338    | 3,226        | 29       |    |
|                               | <i>Osmar5</i>               | AP002864      | 6        | 9230-9480*     | ND           | ND       |    |
|                               | <i>Arabidopsis thaliana</i> | <i>Atmar1</i> | AF262043 | 5              | 65593-66782* | ND       | ND |
|                               |                             | <i>Atmar2</i> | AC007662 | 2              | 4197-3071*   | ND       | ND |
|                               |                             | <i>Atmar3</i> | AF272705 | 5              | 54282-55498* | ND       | ND |
| <i>Atmar4</i>                 |                             | AC006423      | 1        | 83021-83759*   | ND           | ND       |    |
| <i>Atmar5</i>                 |                             | AB005236      | 5        | 20260-19674*   | ND           | ND       |    |
| <i>Atmar6</i>                 |                             | AL161498      | 4        | 88528-89423*   | ND           | ND       |    |
| <i>Atmar7</i>                 |                             | AC006436      | 2        | 30673-29880*   | ND           | ND       |    |
| <i>Atmar8</i>                 |                             | AC005169      | 2        | 50179-50773*   | ND           | ND       |    |
| <i>Atmar9</i>                 |                             | AL161513      | 4        | 138936-138204* | ND           | ND       |    |
| <b>DD37D animal MLEs</b>      |                             |               |          |                |              |          |    |
| <i>Caenorhabditis elegans</i> | <i>Ce37mar1</i>             | AC006622      | 4        | 9089-10370     | 1,282        | 24       |    |
| <i>Sarcophaga peregrina</i>   | <i>Sp37mar1</i>             | AB054644      | ND       | 21-1179        | 1,158        | 25       |    |
| <i>Bombyx mori</i>            | <i>Bmmar1</i>               | U47917        | ND       | 1-1307         | 1,307        | 28       |    |
| <b>DD34D animal MLEs</b>      |                             |               |          |                |              |          |    |
| <i>Drosophila mauritiana</i>  | <i>Mos1</i>                 | X78906        | ND       | 1-1293         | 1,293        | 28       |    |
| <i>Ceratitis capitata</i>     | <i>Ccmar1</i>               | U40493        | ND       | 1-1268         | 1,268        | 30       |    |
| <i>Homo sapiens</i>           | <i>Hsmar1</i>               | U52077        | #        | 1-1287         | 1,287        | 30       |    |
|                               | <i>Hsmar2</i>               | U49974        | #        | 1-1301         | 1,301        | 31       |    |

Acc, GenBank accession number; Chr, chromosome number; ND, non determined. The ends of several rice elements were defined by identification of terminal inverted repeats (TIRs) highly similar to those of *Soymar1* and *Osmar1* in the DNA flanking the putative transposase. In some other cases (\*), eNDs of MLEs were not determined, and coordinates thus refer to regions similar to MLE transposases; #, consensus sequence. *Soymar1*, *Osmar1*, *Bmmar1*, *Mos1*, *Ccmar1*, *Hsmar1*, and *Hsmar2* were previously described (see text for references).
